# Supplementary material for: Computational Insights into Papain-Like Protease Inhibition: Antimicrobial Peptides as Potential Therapeutics Against SARS-CoV-2
Source: Research Square preprint supplement (doi:10.21203/rs.3.rs-7586160/v1), 2025-09-18
Supplement: Supplementary file 1 [file 0650179e3324b2568a2be08f.docx]

**Novel Insights for Developing Papain-Like Protease Inhibitors: The Use of Antimicrobial Peptides Targeting SARS-CoV-2**

**Erenilson dos Santos Moreira1,3, Fabricio Santos Barbosa2,3, Jailan Sousa5,3, Hugo Mauricio Peña Mercado4, Tarcisio Silva Melo3, Sergio Siqueira3, Aristóteles Góes-Neto4, and Bruno Silva Andrade1, 3***

1 Graduate Program In Chemistry (PGQUI), State University of Southwest Bahia, Jequié 45031-900, BA, Brazil.

2 Graduate Program In Biotechnology (PPGBIOTEC-UEFS). State University of Feira de Santana, Feira de Santana 44036-900, BA , Brazil.

3 Laboratory of Bioinformatics and Computational Chemistry (LBQC). State University of Southwest Bahia, Department of Biological Sciences (DCB), Jequié 45031-900, BA, Brazil.

4 Department of Microbiology, Molecular and Computational Biology of Fungi Laboratory, Instituto de Ciências Biológicas, Universidade Federal de Minas Gerais, Belo Horizonte 31270-901, MG, Brazil.

5 Graduate Program in Bioinformatics, Federal University of Minas Gerais, Belo Horizonte 31270-901, MG, Brazil.

***corresponding author:** [**bandrade@uesb.edu.br**](mailto:bandrade@uesb.edu.br)

**Supporting Information**

**Table S1** Protein-peptide docking rank of the best complexes with the SARS-CoV-2 PLpro.

| Peptide ID | Sequence | DL Score* | Prediction | PPV** |
| --- | --- | --- | --- | --- |
| 10892 | YAX21FIR | 0.304 | Non-Toxin | 0.257 |
| 26956 | ENX20ILK | 0.36 | Non-Toxin | 0.326 |
| 10004 | FFX21YFR | 0.672 | Toxin | 0.711 |
| 17047 | LYX22EQL | 0.252 | Non-Toxin | 0.193 |
| 16746 | QLX25DSR | 0.698 | Toxin | 0.743 |
| 33035 | ILX15IWR | 0.845 | Toxin | 0.925 |
| 13990 | LLN22FIK | 0.117 | Non-Toxin | 0.026 |
| 59826 | SIA21FLR | 0.207 | Non-Toxin | 0.137 |
| 59870 | NDD17HSK | 0.241 | Non-Toxin | 0.179 |
| 58620 | LGR10PQY | 0.371 | Non-Toxin | 0.340 |

***DLScore:** Deep learning Score (indicating probability of toxicity). ****PPV:** Positive Predictive Value (probability of correct prediction).

**Table S2** Enthalpic contribution of the different energetic components involved in the interaction between peptide 10892 and its molecular target. The table is divided into: Complex, Receptor, and Peptide, representing the complete system (protein + peptide), the isolated protein, and the isolated peptide, respectively.

| Complex | | | | | | | | | | | | |
| --- | --- | --- | --- | --- | --- | --- | --- | --- | --- | --- | --- | --- |
| Time (ns) | BOND | ANGLE | DIHED | VDWAALS | EEL | 1-4 VDW | 1-4 EEL | EGB | ESURF | GGAS | GSOLV | TOTAL |
| Average | 1001.22 | 2484.28 | -7994.54 | -2661.08 | -7388.09 | 1662.88 | 3077.52 | -1136.71 | 128.09 | -9817.8 | -1008.62 | -10826.42 |
| SD | 26.1 | 38.12 | 32.4 | 26.36 | 44.49 | 18.03 | 8.7 | 37.04 | 2.27 | 66.15 | 36.25 | 54.78 |
| SEM | 0.12 | 0.17 | 0.15 | 0.12 | 0.2 | 0.08 | 0.04 | 0.17 | 0.01 | 0.3 | 0.16 | 0.25 |
| Receptor | | | | | | | | | | | | |
| Time (ns) | BOND | ANGLE | DIHED | VDWAALS | EEL | 1-4 VDW | 1-4 EEL | EGB | ESURF | GGAS | GSOLV | TOTAL |
| Average | 960.49 | 2397.6 | -7481.5 | -2577.93 | -7225.49 | 1596.86 | 2961.53 | -1119.61 | 119.63 | -9368.43 | -999.98 | -10368.41 |
| SD | 25.55 | 37.39 | 31.22 | 25.7 | 43.84 | 17.77 | 8.6 | 36.32 | 2.12 | 64.52 | 35.64 | 53.74 |
| SEM | 0.11 | 0.17 | 0.14 | 0.12 | 0.2 | 0.08 | 0.04 | 0.16 | 0.01 | 0.29 | 0.16 | 0.24 |
| Pepetide | | | | | | | | | | | | |
| Time (ns) | BOND | ANGLE | DIHED | VDWAALS | EEL | 1-4 VDW | 1-4 EEL | EGB | ESURF | GGAS | GSOLV | TOTAL |
| Average | 40.73 | 86.68 | -513.04 | -47.7 | -158.43 | 66.02 | 115.98 | -28.69 | 12.86 | -409.75 | -15.83 | -425.58 |
| SD | 5.24 | 7.19 | 5.6 | 3.73 | 2.53 | 3.23 | 1.34 | 1.42 | 0.45 | 10.92 | 1.12 | 10.66 |
| SEM | 0.02 | 0.03 | 0.03 | 0.02 | 0.01 | 0.01 | 0.01 | 0.01 | 0.0 | 0.05 | 0.01 | 0.05 |

**SEM:** Standard Error of the Mean. **SD:** Standard Deviation.

**Table S3** Enthalpic analysis of the related energetic constituents in the interaction between peptide 26956 and PLpro. The table presents the results, discriminating the average enthalpic contributions for three distinct systems: Complex (protein + peptide), Receptor (isolated protein), and isolated peptide 26956.

| Complex | | | | | | | | | | | | |
| --- | --- | --- | --- | --- | --- | --- | --- | --- | --- | --- | --- | --- |
| Time (ns) | BOND | ANGLE | DIHED | VDWAALS | EEL | 1-4 VDW | 1-4 EEL | EGB | ESURF | GGAS | GSOLV | TOTAL |
| Average | 1005.9 | 2494.97 | -8026.61 | -2704.8 | -7384.4 | 1675.5 | 3037.01 | -1186.99 | 126.54 | -9902.42 | -1060.45 | -10962.87 |
| SD | 26.24 | 38.19 | 29.43 | 27.15 | 43.82 | 18.25 | 8.32 | 37.17 | 2.46 | 67.96 | 36.17 | 56.08 |
| SEM | 0.12 | 0.17 | 0.13 | 0.12 | 0.2 | 0.08 | 0.04 | 0.17 | 0.01 | 0.3 | 0.16 | 0.25 |
| Receptor | | | | | | | | | | | | |
| Time (ns) | BOND | ANGLE | DIHED | VDWAALS | EEL | 1-4 VDW | 1-4 EEL | EGB | ESURF | GGAS | GSOLV | TOTAL |
| Average | 961.06 | 2401.75 | -7475.15 | -2593.04 | -7173.28 | 1599.72 | 2963.97 | -1168.75 | 120.04 | -9314.97 | -1048.71 | -10363.68 |
| SD | 25.63 | 37.52 | 29.2 | 26.28 | 43.22 | 17.9 | 8.12 | 35.9 | 2.28 | 65.72 | 35.12 | 55.13 |
| SEM | 0.11 | 0.17 | 0.13 | 0.12 | 0.19 | 0.08 | 0.04 | 0.16 | 0.01 | 0.29 | 0.16 | 0.25 |
| Peptide | | | | | | | | | | | | |
| Time (ns) | BOND | ANGLE | DIHED | VDWAALS | EEL | 1-4 VDW | 1-4 EEL | EGB | ESURF | GGAS | GSOLV | TOTAL |
| Average | 44.84 | 93.21 | -551.46 | -46.33 | -191.2 | 75.79 | 73.04 | -48.19 | 15.74 | -502.11 | -32.45 | -534.56 |
| SD | 5.47 | 7.49 | 6.17 | 3.49 | 3.26 | 3.67 | 1.7 | 2.1 | 0.5 | 11.18 | 1.94 | 10.88 |
| SEM | 0.02 | 0.03 | 0.03 | 0.02 | 0.01 | 0.02 | 0.01 | 0.01 | 0.0 | 0.05 | 0.01 | 0.05 |

**SEM:** Standard Error of the Mean. **SD:** Standard Deviation.
